# Supplementary material for: Job Satisfaction and Burnout in Croatian Physiotherapists
Source: MDPI journal article supplement (doi:10.3390/healthcare10050905), 2022-05-13
Supplement: s1 [file s1]

# Supplementary materials

**Table S1.** Multivariate regression analyses on Job Descriptive Index facets and sociodemographic data (N = 404).

| Facets                           | B     | SE   | t     | 95% CI          | p                |
|----------------------------------|-------|------|-------|-----------------|------------------|
| <b>Coworkers</b>                 |       |      |       |                 |                  |
| Age                              | -0.06 | 0.06 | -1.08 | (-0.17)-0.05    | 0.28             |
| Workplace                        | 0.09  | 0.30 | 0.29  | (-0.51)-0.69    | 0.77             |
| Gender                           | 0.84  | 0.41 | 2.03  | 0.03-1.65       | <b>0.04</b>      |
| Years of professional experience | 0.04  | 0.05 | 0.80  | (-0.06)-0.14    | 0.42             |
| Education                        | 0.26  | 0.24 | 1.09  | (-0.21)-0.74    | 0.28             |
| Marital status                   | -0.31 | 0.19 | -1.61 | (-0.69)-0.07    | 0.11             |
| <b>Supervisors</b>               |       |      |       |                 |                  |
| Age                              | -0.12 | 0.08 | -1.59 | (-0.28)-0.03    | 0.11             |
| Workplace                        | 1.62  | 0.42 | 3.86  | 0.79-2.45       | <b>&lt;0.001</b> |
| Gender                           | 1.08  | 0.57 | 1.89  | (-0.04)-2.21    | 0.06             |
| Years of professional experience | 0.07  | 0.07 | 0.92  | (-0.08)-0.21    | 0.36             |
| Education                        | 0.27  | 0.34 | 0.79  | (-0.39)-0.93    | 0.43             |
| Marital status                   | -0.63 | 0.27 | -2.34 | (-1.17)-(-0.10) | <b>0.02</b>      |
| <b>Work itself</b>               |       |      |       |                 |                  |
| Age                              | -0.10 | 0.08 | -1.27 | (-0.26)-0.06    | 0.21             |
| Workplace                        | 2.31  | 0.43 | 5.35  | 1.46-3.15       | <b>&lt;0.001</b> |
| Gender                           | 1.15  | 0.59 | 1.96  | (-0.01)-2.29    | <b>0.05</b>      |
| Years of professional experience | 0.05  | 0.07 | 0.73  | (-0.09)-0.19    | 0.46             |
| Education                        | 0.58  | 0.34 | 1.68  | (-0.09)-1.26    | 0.09             |
| Marital status                   | -0.45 | 0.28 | -1.61 | (-0.99)-0.09    | 0.11             |
| <b>Pay</b>                       |       |      |       |                 |                  |
| Age                              | -0.04 | 0.07 | -0.61 | (-0.19)-0.09    | 0.54             |
| Workplace                        | 1.47  | 0.39 | 0.19  | 0.71-2.23       | <b>&lt;0.001</b> |
| Gender                           | 0.98  | 0.53 | 0.09  | (-0.05)-2.02    | 0.06             |
| Years of professional experience | 0.02  | 0.07 | 0.06  | (-0.011)-0.15   | 0.71             |
| Education                        | 0.12  | 0.31 | 0.02  | (-0.49)-0.73    | 0.69             |
| Marital status                   | -0.46 | 0.25 | -0.09 | (-0.95)-0.03    | 0.07             |
| <b>Promotions</b>                |       |      |       |                 |                  |
| Age                              | -0.06 | 0.07 | -0.78 | (-0.19)-0.09    | 0.44             |
| Workplace                        | 0.36  | 0.39 | 0.94  | (-0.39)-1.12    | 0.35             |
| Gender                           | 0.07  | 0.53 | 2.15  | 0.09-2.17       | <b>0.03</b>      |
| Years of professional experience | 0.31  | 0.07 | 0.32  | (-0.11)-0.15    | 0.75             |
| Education                        | 0.33  | 0.31 | 1.08  | (-0.27)-0.94    | 0.28             |
| Marital status                   | -0.53 | 0.25 | -2.13 | (-1.02)-(-0.04) | <b>0.03</b>      |

B – unstandardized beta coefficient; SE—standard error; CI—confidence interval; workplace: 1=government, 2=private; gender: 1=male, 2=female; education: 1=technician, 2=BSc, 3=MSc; marital status: 1=married, 2=relationship; 3=single. The bold indicates statistically significant values.

**Table S2.** Multivariate regression analyses on Oldenburg Burnout Inventory dimensions and sociodemographic data (N = 404).

|                                  | <b>B</b> | <b>SE</b> | <b>t</b> | <b>95% CI</b>   | <b>p</b>    |
|----------------------------------|----------|-----------|----------|-----------------|-------------|
| <b>Disengagement</b>             |          |           |          |                 |             |
| Age                              | 0.04     | 0.10      | 0.43     | (-0.16)-0.25    | 0.67        |
| Workplace                        | -1.12    | 0.56      | -2.02    | (-2.22)-(-0.03) | <b>0.04</b> |
| Gender                           | -0.99    | 0.76      | -1.30    | (-2.47)-0.50    | 0.19        |
| Years of professional experience | -0.04    | 0.09      | -0.47    | (-0.23)-0.14    | 0.64        |
| Education                        | -0.09    | 0.45      | -0.20    | (-0.96)-0.79    | 0.84        |
| Marital status                   | 0.82     | 0.36      | 2.28     | 0.11-1.52       | <b>0.02</b> |
| <b>Exhaustion</b>                |          |           |          |                 |             |
| Age                              | 0.05     | 0.1       | 0.48     | (-0.15)-0.25    | 0.63        |
| Workplace                        | -0.19    | 0.54      | -0.36    | (-1.26)-0.87    | 0.72        |
| Gender                           | 0.16     | 0.74      | 0.22     | (-1.28)-1.61    | 0.82        |
| Years of professional experience | 0.004    | 0.09      | 0.05     | (-0.18)-0.19    | 0.96        |
| Education                        | -0.56    | 0.43      | -1.29    | (-1.41)-0.29    | 0.19        |
| Marital status                   | 0.41     | 0.35      | 1.17     | (-0.28)-1.09    | 0.24        |

B – unstandardized beta coefficient; SE—standard error; CI—confidence interval; workplace: 1=government, 2=private; gender: 1=male, 2=female; education: 1=technician, 2=BSc, 3=MSc; marital status: 1=married, 2=relationship; 3=single. The bold indicates statistically significant values.
